# Supplementary material for: The management of heart failure cardiogenic shock: an international RAND appropriateness panel
Source: Springer Nature journal article supplement (doi:10.1186/s13054-024-04884-5), 2024-04-02
Supplement: MOESM1 [file 26934722]

**SUPPLEMENTARY MATERIAL**

**Supplemental Figure**

**Figure S1 – PRISMA Flow Diagram of Literature Search**

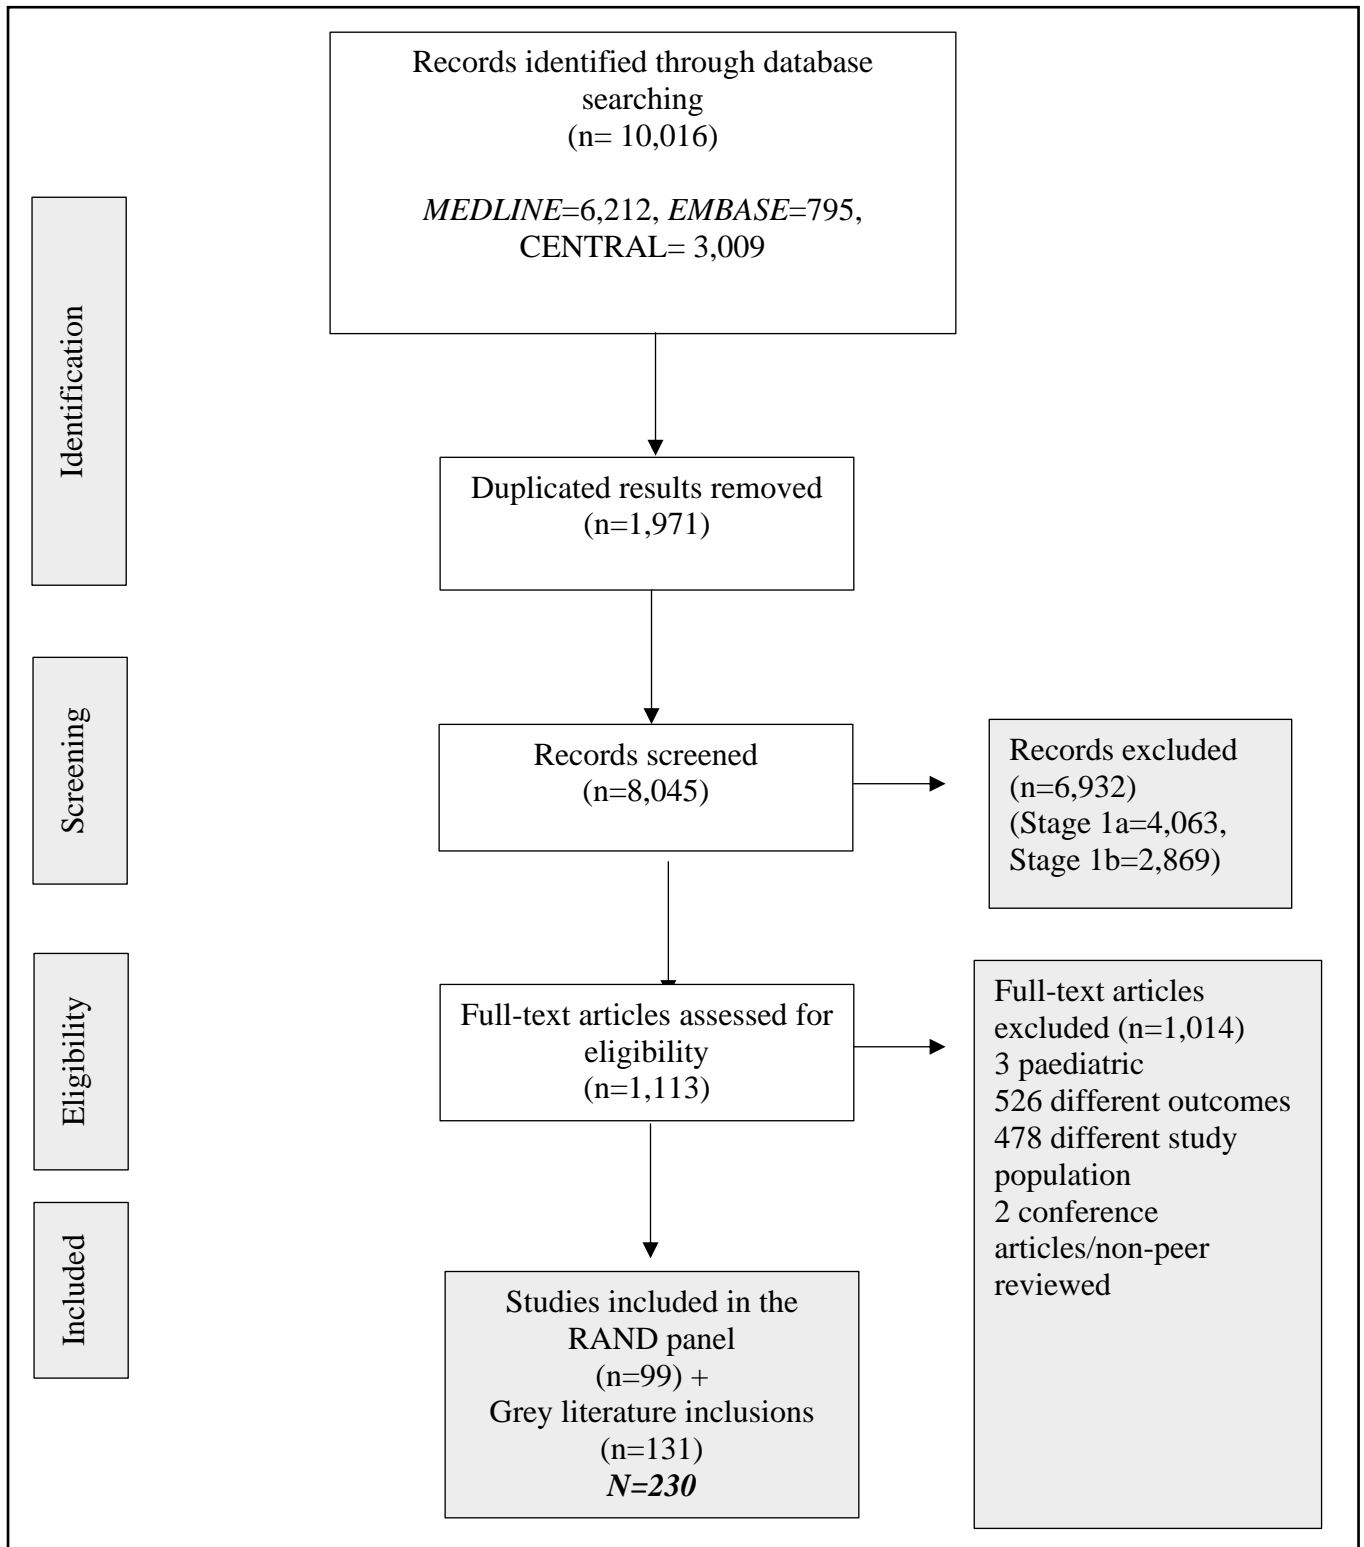

## Supplemental Tables

**Table S1 – Anonymised Individual Panellist Scoring: Initial Assessment and Management of HF-CS**

| Statement                                                                                                          | Individual Panellist Scores<br>(median in bold) | RAND Panel Outcome |
|--------------------------------------------------------------------------------------------------------------------|-------------------------------------------------|--------------------|
| Please rate the appropriateness of the following in the initial assessment and management of SCAI Stage B/C HF-CS: |                                                 |                    |
| Focussed Cardiac Ultrasound                                                                                        | 7-7-8-8-8-8-9- <b>9</b> -9-9-9-9-9-9-9          | Appropriate        |
| Pulmonary artery catheter                                                                                          | 3-4-5-5-5-5-6- <b>6</b> -7-7-7-7-8-8-9          | Uncertain          |
| Point of care thoracic ultrasound                                                                                  | 2-2-2-3-3-4-4- <b>5</b> -5-6-6-7-7-7-8-9        | Uncertain          |
| Point of care Abdominal Ultrasound                                                                                 | 1-2-2-2-3-3-3- <b>3</b> -4-4-4-5-5-7-7-8        | Uncertain          |
| Norepinephrine as 1st line vasopressor                                                                             | 1-5-5-7-7-7-7- <b>7</b> -7-8-8-8-8-9-9-9        | Appropriate        |
| Dopamine as 1st line vasopressor                                                                                   | 1-1-1-2-3-3-3- <b>3</b> -4-4-5-5-5-5-6-6        | Uncertain          |
| Dobutamine as 1st line inotrope                                                                                    | 1-4-5-5-5-6-6- <b>6</b> -7-7-7-7-8-8-8-9        | Appropriate        |
| Milrinone as 1st line inotrope                                                                                     | 1-4-4-5-5-5-5- <b>6</b> -6-7-7-7-7-8-8-9        | Uncertain          |
| Shock team discussion in patients suitable for escalation to tMCS                                                  | 2-5-7-7-7-7-7- <b>8</b> -8-9-9-9-9-9-9-9        | Appropriate        |
| Application of prognostic scoring tools e.g. IHVI and CardShock to inform management and escalation                | 1-2-3-3-3-3-4- <b>4</b> -4-5-5-5-5-6-8-8        | Uncertain          |

For each question, median scores were allocated as inappropriate if scoring <3.5, uncertain if ≥3.5 and <6.5 uncertain and appropriate if ≥6.5. DI was calculated using the RAND DI and disagreement deemed if DI ≥1 amongst the panellists.

HF-CS, Heart Failure related Cardiogenic Shock; IHVI, Inova Heart and Vascular Institute; SCAI, The Society of Cardiovascular Angiography and Interventions; tMCS, temporary Mechanical Circulatory Support.

**Table S2 – Anonymised Individual Panellist Scoring: Escalation to tMCS in HF-CS**

| Statement                                                                                                                                                                                                         | Individual Panellist Scores<br>(median in bold) | RAND Panel Outcome |
|-------------------------------------------------------------------------------------------------------------------------------------------------------------------------------------------------------------------|-------------------------------------------------|--------------------|
| <b>Regarding the use of clinical, biochemical and haemodynamic parameters to guide escalation to tMCS in the context of maximal or optimal pharmacotherapy, please rate the appropriateness of the following:</b> |                                                 |                    |
| Failure to achieve adequate diuresis / clinical decongestion                                                                                                                                                      | 5-6-6-6-7-7-7- <b>7-8</b> -8-8-8-8-8-9          | Appropriate        |
| Lactate clearance                                                                                                                                                                                                 | 4-7-7-7-7-8-8- <b>8-8</b> -8-8-8-9-9-9-9        | Appropriate        |
| Serial worsening of liver function tests (bilirubin, transaminases & INR)                                                                                                                                         | 5-6-6-6-7-7-7- <b>7-8</b> -8-8-8-8-8-9-9        | Appropriate        |
| Serial worsening of renal function (urine output, creatinine, eGFR)                                                                                                                                               | 4-5-5-6-6-7-7- <b>7-7</b> -8-8-8-8-9-9-9        | Appropriate        |
| Serial worsening of central venous oxygen saturations (ScVO <sub>2</sub> )                                                                                                                                        | 5-5-6-6-6-7-7- <b>7-7</b> -7-8-8-8-8-8-9        | Appropriate        |
| PAC haemodynamic data to inform escalation decisions                                                                                                                                                              | 5-6-6-6-6-6-7- <b>7-8</b> -8-8-9-9-9-9-9        | Appropriate        |
| PAC haemodynamic data to inform device selection                                                                                                                                                                  | 5-5-6-6-7-7-7- <b>8-8</b> -8-8-9-9-9-9-9        | Appropriate        |
| Specific PAC thresholds (informed by AHA guidance, Geller et al.) to inform escalation decisions                                                                                                                  | 3-3-3-3-4-4-4- <b>4-5</b> -5-5-6-6-6-7-8        | Uncertain          |
| Echocardiographic parameters to guide escalation decisions                                                                                                                                                        | 3-4-5-5-5-5-5- <b>6-6</b> -6-6-7-8-8-8-9        | Uncertain          |
| Echocardiographic parameters to guide device selection                                                                                                                                                            | 2-6-6-6-6-6-7- <b>7-7</b> -7-8-8-9-9-9-9        | Appropriate        |
| <b>Regarding the selection of tMCS in the management of SCAI Stage C HFCS, please rate the appropriateness of the following:</b>                                                                                  |                                                 |                    |
| IABP as a tMCS option for bridge to recovery or durable therapies                                                                                                                                                 | 1-3-3-4-4-5-5- <b>5-6</b> -7-7-7-7-7-8          | Uncertain          |
| Impella CP as a tMCS option for bridge to recovery or candidacy for durable HF therapies                                                                                                                          | 3-3-3-4-4-5-5- <b>5-5</b> -6-6-6-7-7-7-8        | Uncertain          |
| Impella 5.0/5.5 as a tMCS option for bridge to recovery or candidacy for AHF therapies                                                                                                                            | 3-5-6-6-6-6-7- <b>7-7</b> -7-7-7-8-8-8-8        | Appropriate        |
| Routine mechanical LV decompression in the context of peripheral V-A ECMO                                                                                                                                         | 2-3-3-4-5-5-6- <b>6-7</b> -7-7-8-8-8-8-8        | Appropriate        |
| Optimised pharmacological LV decompression prior to mechanical LV decompression                                                                                                                                   | 2-5-6-6-6-6-7- <b>7-7</b> -7-8-8-8-8-8-9        | Appropriate        |
| IABP as a mechanical LV decompression strategy in peripheral V-A ECMO                                                                                                                                             | 1-2-4-4-5-5-5- <b>5-6</b> -6-6-6-6-6-7-8        | Uncertain          |
| Impella (CP/5.0/5.5) as a mechanical LV decompression strategy in peripheral V-A ECMO                                                                                                                             | 5-5-5-6-6-6-6- <b>6-7</b> -7-7-8-8-8-8-9        | Appropriate        |

For each question, median scores were allocated as inappropriate if scoring <3.5, uncertain if ≥3.5 and <6.5 uncertain and appropriate if ≥6.5. DI was calculated using the RAND DI and disagreement deemed if DI ≥1 amongst the panellists.

AHA, American Heart Association; AHF, Advanced Heart Failure; eGFR, estimated Glomerular Filtration Rate; HF, Heart Failure; HF-CS, Heart Failure related Cardiogenic Shock; IABP, Intra-aortic Balloon Pump; Impella™ CP, Impella™ Central Pump; INR, International Normalised Ratio; LV, Left Ventricle; PAC, Pulmonary Artery Catheterisation; SCAI, Society for Cardiovascular Angiography and Interventions; ScVO<sub>2</sub>, Systemic Central Venous Oxygen Levels; tMCS, temporary Mechanical Circulatory Support; V-A ECMO, Venoarterial Extracorporeal Membrane Oxygenation.

**Table S3 – Anonymised Individual Panellist Scoring: Weaning of tMCS in HF-CS**

| Statement                                                                                                                                                 | Individual Panellist Scores<br>(median in bold) | RAND Panel Outcome |
|-----------------------------------------------------------------------------------------------------------------------------------------------------------|-------------------------------------------------|--------------------|
| Regarding the weaning of tMCS in HF-CS, please rate the appropriateness of the following:                                                                 |                                                 |                    |
| Routine PAC to assess / support weaning of tMCS                                                                                                           | 4-5-6-7-7-7-7- <b>7-7</b> -7-7-8-8-9-9-9        | Appropriate        |
| At least one attempt to wean tMCS before decision to transition to AHF therapies                                                                          | 2-5-6-7-7-7-7- <b>7-8</b> -8-8-9-9-9-9-9        | Appropriate        |
| Routine echocardiogram to assess / support weaning of tMCS                                                                                                | 3-4-4-7-7-7-7- <b>7-7</b> -8-8-8-9-9-9-9        | Appropriate        |
| Use of Levosimendan to support weaning of tMCS                                                                                                            | 1-1-1-2-2-3-4- <b>4-5</b> -5-5-5-6-8-8-8        | Uncertain          |
| Use of escalating inotropes to wean from tMCS                                                                                                             | 1-3-3-5-5-6-6- <b>6-6</b> -7-7-7-7-8-8-9        | Uncertain          |
| Use of intravenous vasodilators to support weaning from tMCS                                                                                              | 1-4-4-5-5-6-6- <b>6-7</b> -7-7-7-7-8-8-9        | Appropriate        |
| Trial of endothelin receptor antagonists or phosphodiesterase inhibitors in patients with evidence of pulmonary hypertension to support weaning from tMCS | 3-3-3-3-3-4-4- <b>5-5</b> -5-5-5-6-6-6-7        | Uncertain          |

For each question, median scores were allocated as inappropriate if scoring <3.5, uncertain if ≥3.5 and <6.5 uncertain and appropriate if ≥6.5. DI was calculated using the RAND DI and disagreement deemed if DI ≥1 amongst the panellists.

HF-CS, Heart Failure related Cardiogenic Shock; PAC, Pulmonary Artery Catheterisation; tMCS, temporary Mechanical Circulatory Support.

**Table S4 – Median Scores by Geographical Location (Europe vs North America)**

| <b>Statement</b>                                                                                                                                                                                                  | <b>Overall Median</b> | <b>Europe (n= 9)</b> | <b>North America (n= 7)</b> |
|-------------------------------------------------------------------------------------------------------------------------------------------------------------------------------------------------------------------|-----------------------|----------------------|-----------------------------|
| <b>Please rate the appropriateness of the following in the initial assessment and management of SCAI Stage C HF-CS:</b>                                                                                           |                       |                      |                             |
| Focussed Cardiac Ultrasound                                                                                                                                                                                       | 9                     | 9                    | 9                           |
| Pulmonary artery catheter                                                                                                                                                                                         | 6                     | 5                    | 7                           |
| Point of care thoracic ultrasound                                                                                                                                                                                 | 5                     | 6                    | 3                           |
| Point of care Abdominal Ultrasound                                                                                                                                                                                | 3.5                   | 4                    | 3                           |
| Norepinephrine as 1st line vasopressor                                                                                                                                                                            | 7                     | 7                    | 8                           |
| Dopamine as 1st line vasopressor                                                                                                                                                                                  | 3.5                   | 3                    | 5                           |
| Dobutamine as 1st line inotrope                                                                                                                                                                                   | 6.5                   | 6                    | 7                           |
| Milrinone as 1st line inotrope                                                                                                                                                                                    | 6                     | 6                    | 7                           |
| Shock team discussion in patients suitable for escalation to tMCS                                                                                                                                                 | 8                     | 8                    | 9                           |
| Application of prognostic scoring tools e.g. IHVI and CardShock to inform management and escalation                                                                                                               | 4                     | 3                    | 5                           |
| <b>Regarding the use of clinical, biochemical and haemodynamic parameters to guide escalation to tMCS in the context of maximal or optimal pharmacotherapy, please rate the appropriateness of the following:</b> |                       |                      |                             |
| Failure to achieve adequate diuresis / clinical decongestion                                                                                                                                                      | 7                     | 7                    | 8                           |
| Lactate clearance                                                                                                                                                                                                 | 8                     | 8                    | 8                           |
| Serial worsening of liver function tests (bilirubin, transaminases & INR)                                                                                                                                         | 7.5                   | 7                    | 8                           |
| Serial worsening of renal function (urine output, creatinine, eGFR)                                                                                                                                               | 7                     | 7                    | 8                           |
| Serial worsening of central venous oxygen saturations (ScVO2)                                                                                                                                                     | 7                     | 7                    | 7                           |
| PAC haemodynamic data to inform escalation decisions                                                                                                                                                              | 7.5                   | 7                    | 9                           |
| PAC haemodynamic data to inform device selection                                                                                                                                                                  | 8                     | 7                    | 9                           |
| Specific PAC thresholds (informed by AHA guidance, Geller et al.) to inform escalation decisions                                                                                                                  | 4.5                   | 4                    | 6                           |
| Echocardiographic parameters to guide escalation decisions                                                                                                                                                        | 6                     | 6                    | 6                           |
| <b>Regarding the selection of tMCS in the management of SCAI Stage C HFCS, please rate the appropriateness of the following:</b>                                                                                  |                       |                      |                             |

|                                                                                                                                                           |     |   |   |
|-----------------------------------------------------------------------------------------------------------------------------------------------------------|-----|---|---|
| IABP as a tMCS option for bridge to recovery or durable therapies                                                                                         | 5.5 | 4 | 7 |
| Impella CP as a tMCS option for bridge to recovery or candidacy for durable HF therapies                                                                  | 5.0 | 6 | 5 |
| Impella 5.0/5.5 as a tMCS option for bridge to recovery or candidacy for AHF therapies                                                                    | 7.0 | 7 | 7 |
| Routine mechanical LV decompression in the context of peripheral VA ECMO                                                                                  | 6.5 | 7 | 6 |
| Optimised pharmacological LV decompression prior to mechanical LV decompression                                                                           | 7.0 | 7 | 7 |
| IABP as a mechanical LV decompression strategy in peripheral V-A ECMO                                                                                     | 5.5 | 5 | 6 |
| Impella (CP/5.0/5.5) as a mechanical LV decompression strategy in peripheral V-A ECMO                                                                     | 6.5 | 7 | 6 |
| <b>Regarding the weaning of tMCS in HFCS, please rate the appropriateness of the following:</b>                                                           |     |   |   |
| Routine PAC to assess / support weaning of tMCS                                                                                                           | 7   | 7 | 7 |
| At least one attempt to wean tMCS before decision to transition to AHF therapies                                                                          | 7.5 | 8 | 7 |
| Routine echocardiogram to assess / support weaning of tMCS                                                                                                | 7   | 8 | 7 |
| Use of Levosimendan to support weaning of tMCS                                                                                                            | 4.5 | 5 | 3 |
| Use of escalating inotropes to wean from tMCS                                                                                                             | 6   | 6 | 7 |
| Use of intravenous vasodilators to support weaning from tMCS                                                                                              | 6.5 | 6 | 7 |
| Trial of endothelin receptor antagonists or phosphodiesterase inhibitors in patients with evidence of pulmonary hypertension to support weaning from tMCS | 5   | 5 | 5 |

For each question, median scores were allocated as inappropriate if scoring <3.5, uncertain if ≥3.5 and <6.5 uncertain and appropriate if ≥6.5. DI was calculated using the RAND DI and disagreement deemed if DI ≥1 amongst the panellists.

AHA, American Heart Association; AHF, Acute Heart Failure; eGFR, estimated Glomerular Filtration Rate; HF, Heart Failure; HF-CS, Heart Failure related Cardiogenic Shock; IABP, Intra-aortic Balloon Pump; IHVI, Inova Heart and Vascular Institute; Impella™ CP, Impella™ Central Pump; INR, International Normalised Ratio; LV, Left Ventricle; PAC, Pulmonary Artery Catheterisation; SCAI, Society for Cardiovascular Angiography and Interventions; SCAI, The Society of Cardiovascular

Angiography and Interventions; ScVO<sub>2</sub>, Systemic Central Venous Oxygen Levels; tMCS, temporary Mechanical Circulatory Support; V-A ECMO, Venoarterial Extracorporeal Membrane Oxygenation.
